# Supplementary material for: Mixed non-covalent assemblies of ethynyl nile red and ethynyl pyrene along oligonucleotide templates
Source: Royal Society of Chemistry journal article supplement (doi:10.1039/c4ob01860e), 2014-10-17
Supplement: c4ob01860e1.pdf [file c4ob01860e1.pdf]

# Supporting Informations for

## Mixed non-covalent assembled of ethynyl Nile red and ethynyl pyrene along oligonucleotide templates

Philipp Ensslen, Yannic Fritz, Hans-Achim Wagenknecht\*

Institute of Organic Chemistry  
Karlsruhe Institute of Technology (KIT)  
D-76131 Karlsruhe, Germany  
Email: Wagenknecht@kit.edu  
Fax : 49 721 608-47486

| Content                             | Page |
|-------------------------------------|------|
| 1. Materials and methods            | 2    |
| 2. Spectra of titration experiments | 2    |
| 3. References                       | 4    |

## 1. Materials and Methods

DMSO p.a. was purchased from *Carl Roth*. Water was received from Milli-Q system with a resistivity of 18.2 M $\Omega$ -cm. Oligonucleotides were purchased from Metabion. The nucleotides ethynyl pyrene deoxyuridine<sup>[1]</sup> and nile red deoxyuridine<sup>[2]</sup> were synthesized according to literature. Spectroscopic measurements were recorded in water, DMSO or water + 2% DMSO solution at 20 °C using quartz glass cuvettes (10 mm). Samples were corrected by a reference. For the absorption spectra we used a *PerkinElmer Lambda 750* spectrometer equipped with a 6x6 cell changer unit and a peltier system *PTP-6+6*. Fluorescence and excitation spectra were recorded with a *Jobin-Yvon Fluoromax 4* fluorimeter with a step width of 1 nm and an integration time of 0.2 s. All spectra were recorded with an excitation and emission bandpass of 7 nm. A *JASCO J-815* spectropolarimeter equipped with a *Julabo FP35* Refrigerated/Heating Circulator was used to collect the CD data. Each spectrum represented the average of two accumulations recorded between wavelengths of 230 and 800 nm at 0.1 nm intervals with a bandwidth of 1 nm, response time of 8 s and a scan-rate of 20 nm/min. CD data were smoothed using the adaptive smoothing method, which is part of Spectra Analysis software (*JASCO*). All samples were prepared at room temperature. In case of the titrations the Nr- $\equiv$ -dU was added stepwise from a stock solution and incubated for 10 min each step. For the mixture experiments Nr- $\equiv$ -dU and Py- $\equiv$ -dU were premixed in different ratios and then added to the (dA)<sub>20</sub> strand. After 10 min incubation the measurements were taken.

## 2. Spectra of titration experiments

### Titration (dA)<sub>10</sub>

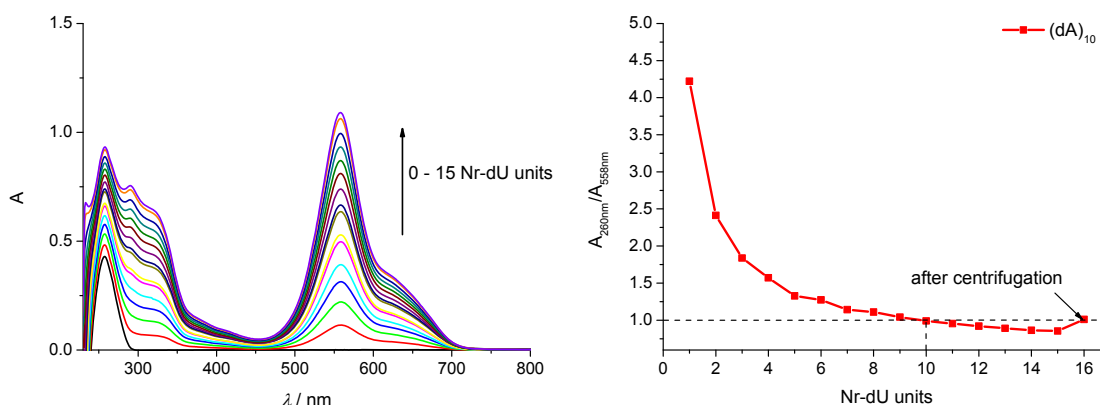

Figure S1: UV/Vis absorption spectra of titration of Nr- $\equiv$ -dU to (dA)<sub>10</sub> (2.5  $\mu$ M in H<sub>2</sub>O + 2 % DMSO)

### Titration (dA)<sub>14</sub>

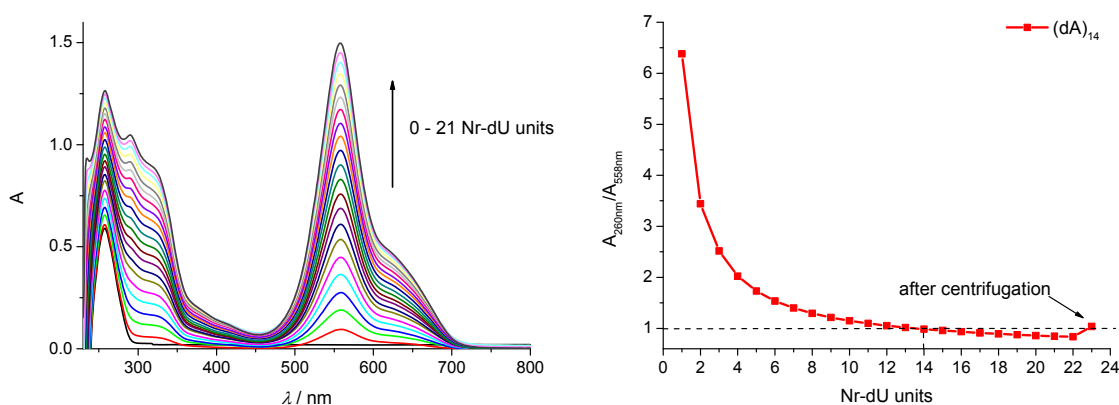

Figure S2: UV/Vis absorption spectra of titration of Nr- $\equiv$ -dU to (dA)<sub>14</sub> (2.5  $\mu$ M in H<sub>2</sub>O + 2 % DMSO)

### Titration (dA)<sub>16</sub>

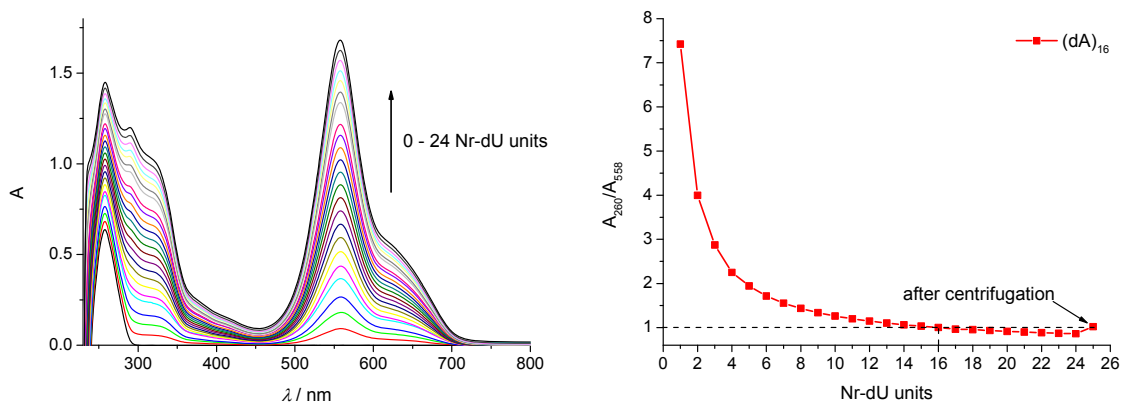

Figure S3: UV/Vis absorption spectra of titration of Nr-≡-dU to (dA)<sub>16</sub> (2.5  $\mu$ M in H<sub>2</sub>O + 2 % DMSO)

### Titration (dA)<sub>20</sub>

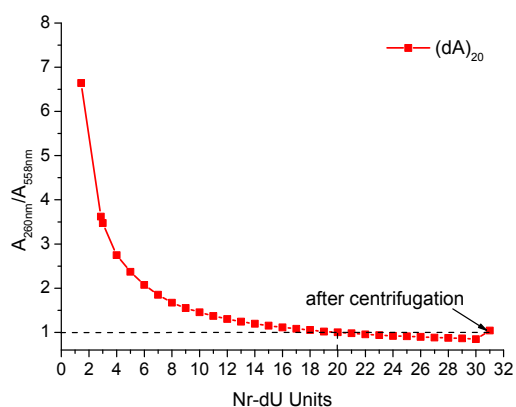

Figure S4: Ratio of  $A_{260nm}/A_{558nm}$  of Nr-≡-dU to (dA)<sub>20</sub> (1,25  $\mu$ M in H<sub>2</sub>O + 2 % DMSO)

### Emission $\lambda_{exc} = 558$ nm

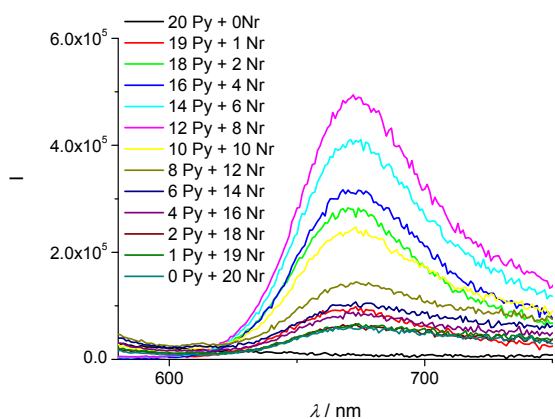

Figure S5: Fluorescence of the assembled Py-≡-dU:Nr-≡-dU mixtures along (dA)<sub>20</sub> (1,25  $\mu$ M in H<sub>2</sub>O + 2% DMSO).

## References

- [1] A. D. Malakhov, E. V. Malakhova, S. V. Kuznitsova, I. V. Grechishnikova, I. A. Prokhorenko, M. V. Skorobogaty, V. A. Korshun, Y. A. Berlin, *Russ. J. Bioorg. Chem.* **2000**, 26, 34-44.
- [2] R. Varghese, P. K. Gajula, T. K. Chakraborty, H.-A. Wagenknecht, *Synlett* **2009**, 3253-3257.
